# Supplementary material for: The use of zinc ions to control the size of Yb/Er:KMnF3 nanocrystals with single band emission
Source: Royal Society of Chemistry journal article supplement (doi:10.1039/c5ce01592h), 2015-01-01
Supplement: c5ce01592h1.pdf [file c5ce01592h1.pdf]

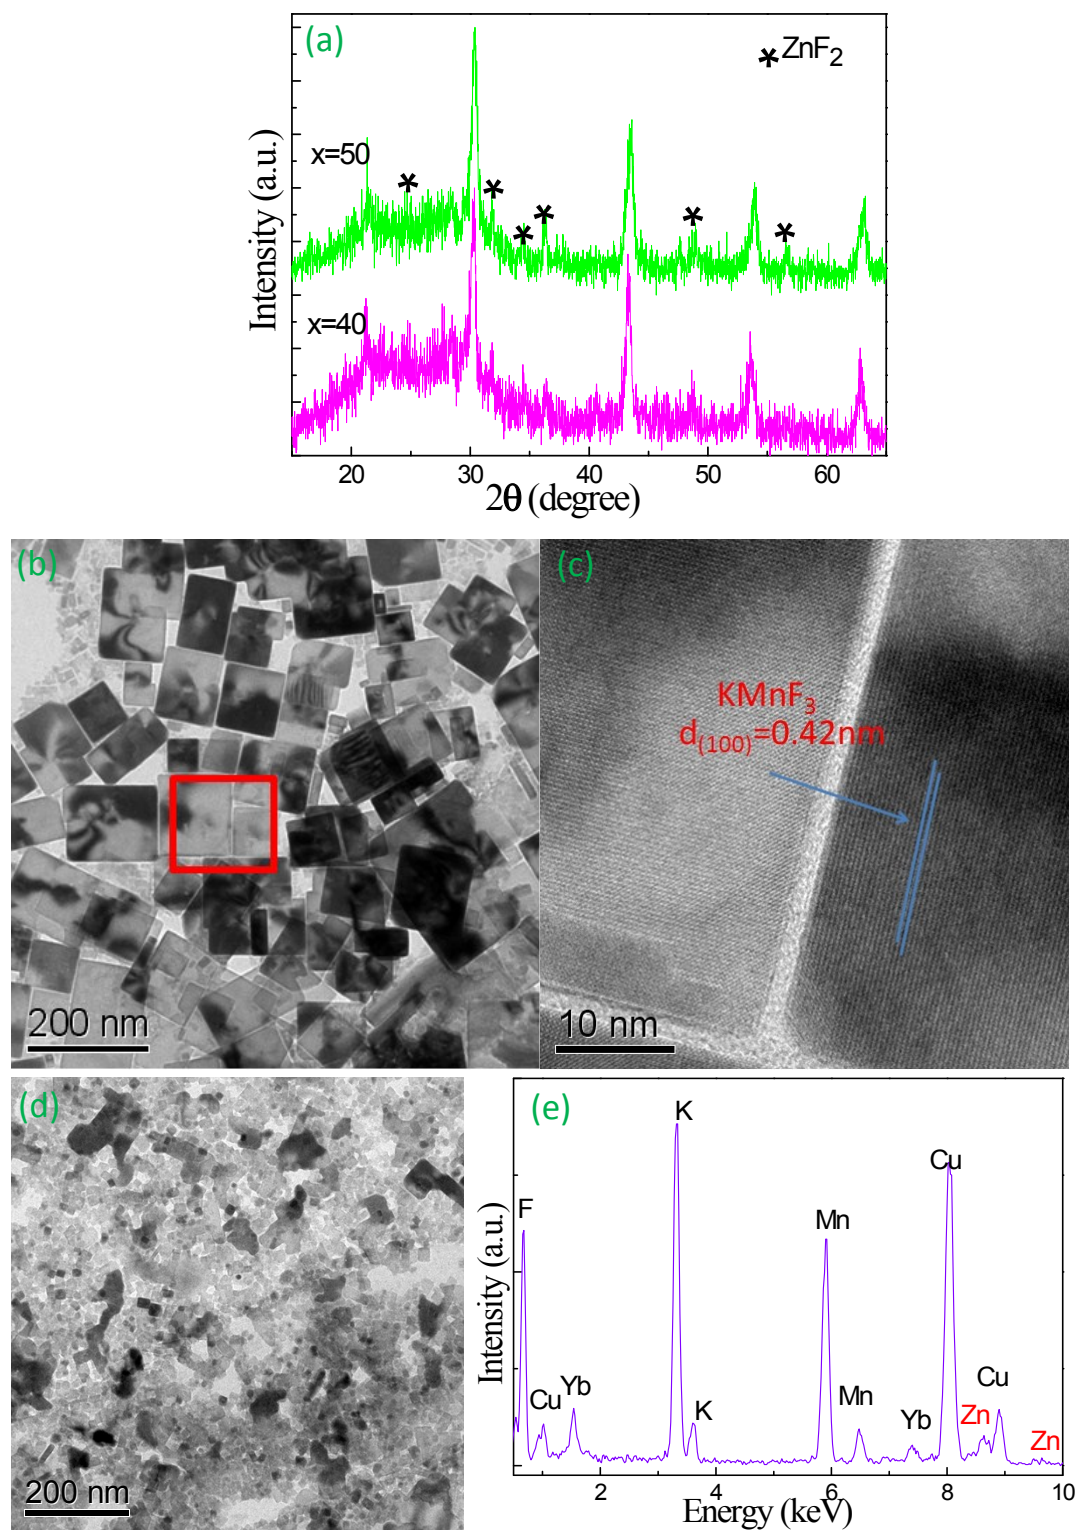

Fig. S1 Yb/Er: KMnF<sub>3</sub> NCs with different Zn<sup>2+</sup> concentration (x%) in the initial solution: (a) XRD patterns; (b) and (c) are the TEM and HRTEM images of x=40, respectively; (d) and (e) are the TEM image and EDS pattern of x =50, respective

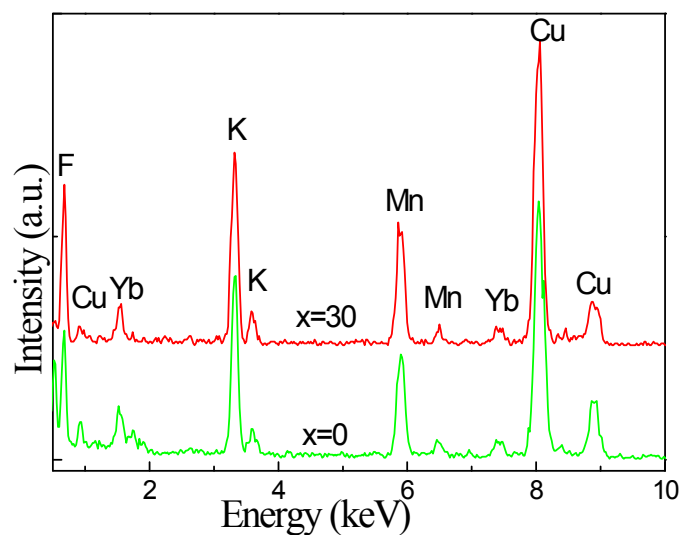

Fig. S2 EDS patterns of Yb/Er: KMnF<sub>3</sub> NCs with different Zn<sup>2+</sup> concentration (x%, x=0, x=30) in the initial solution.

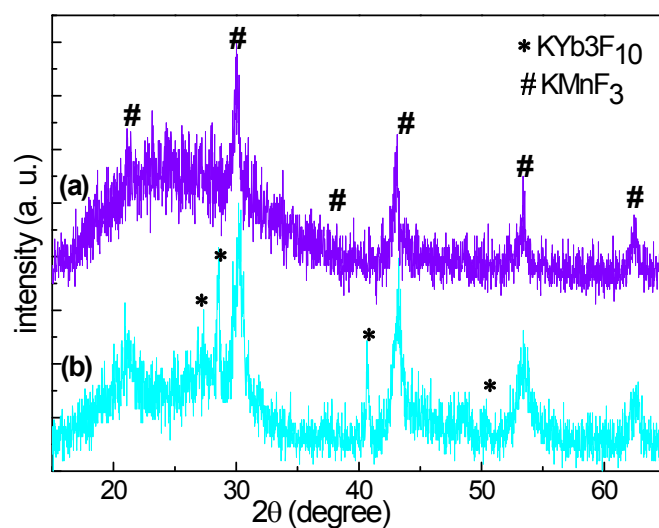

Fig. S3 XRD patterns of Yb/Er: KMnF<sub>3</sub> NCs with Zn<sup>2+</sup> : Mn<sup>2+</sup> ratio at 30:70 (a), and Yb/Er: KMnF<sub>3</sub> NCs with Zn<sup>2+</sup> : Mn<sup>2+</sup> ratio at 0: 50 (b).

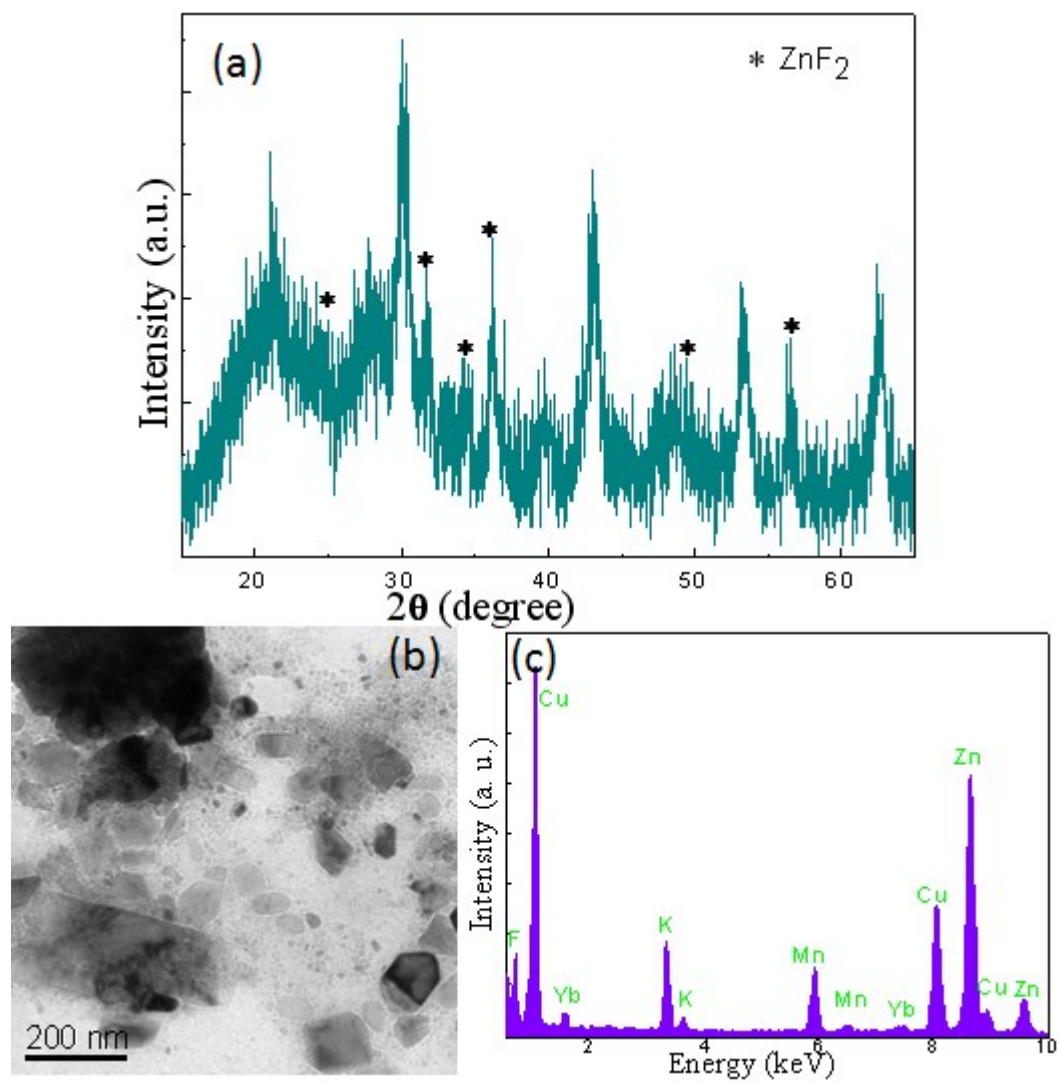

Fig. S4 Yb/Er:  $\text{KMnF}_3$  NCs prepared with prolonging the reaction time to 5h: (a) XRD pattern, (b) TEM image, (c) EDS pattern.

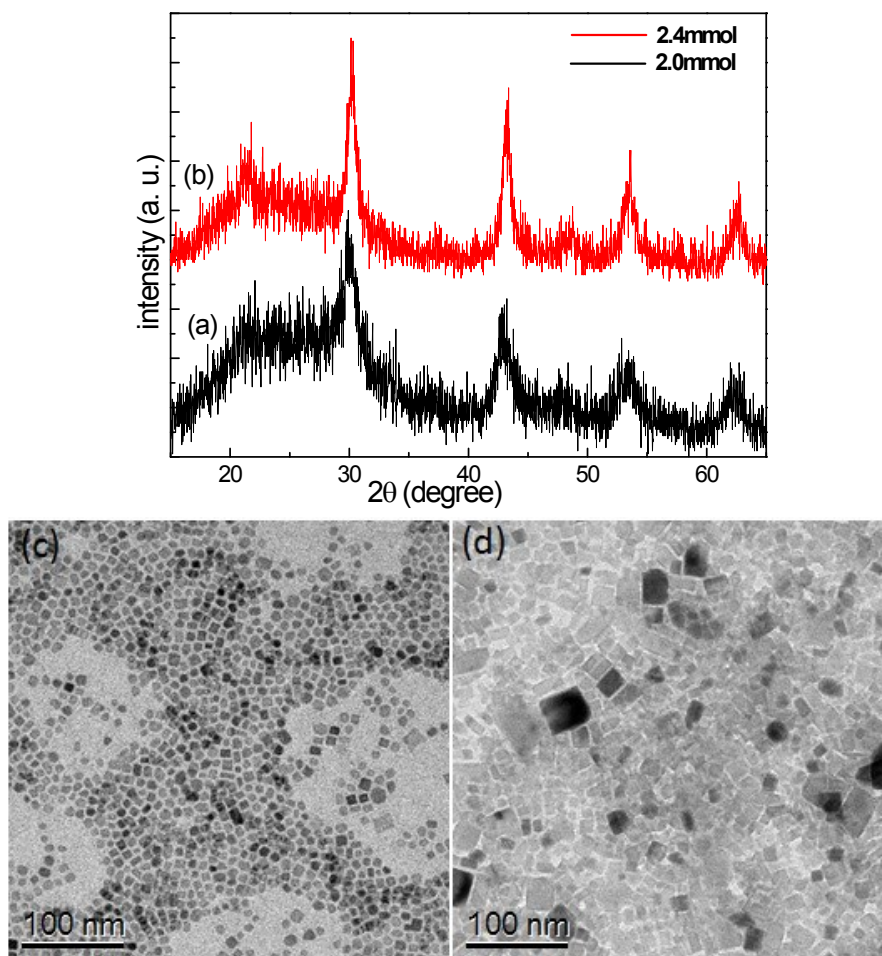

Fig. S5 XRD patterns of Yb/Er:  $\text{KMnF}_3$  NCs prepared with different F<sup>-</sup> concentration, (a) 2.0mmol, (b) 2.4mmol; (c) and (d) are the TEM images of (a) and (b), respectively.

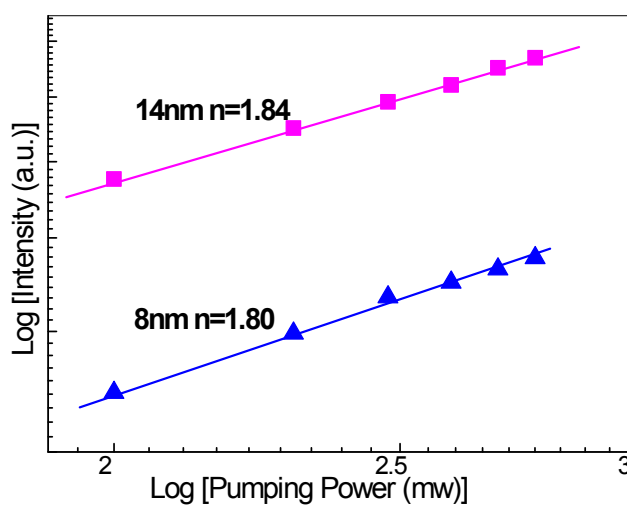

Fig. S6 Log-log plots of UC emission intensity versus pumping power for Yb/Er:  $\text{KMnF}_3$  NCs with 8nm and 14nm.

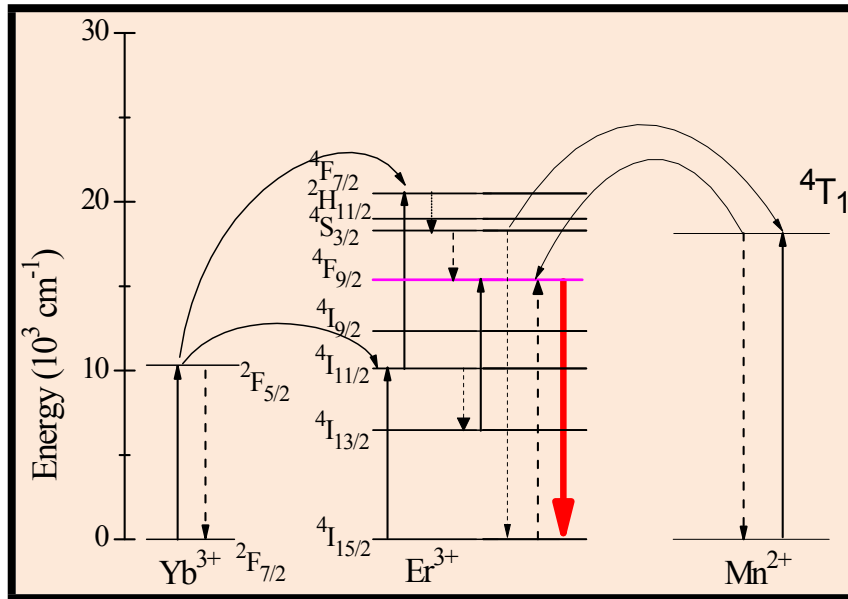

Fig. S7 The possible upconversion energy transfer mechanism.

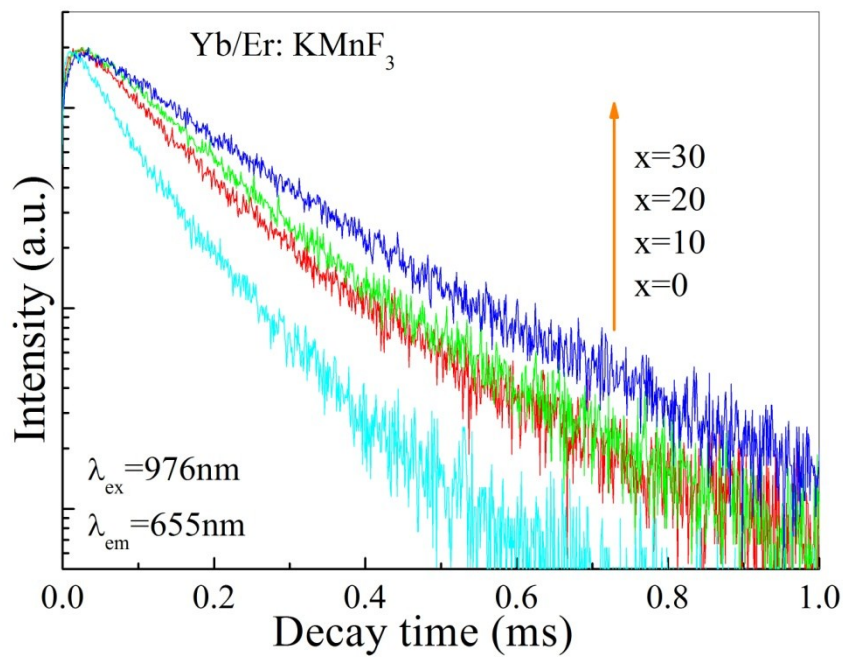

Fig. S8 UC luminescent decay curves of Yb/Er: KMnF<sub>3</sub> NCs with different Zn<sup>2+</sup> concentration (x%, x= 0, 10, 20, 30):  ${}^4F_{9/2} \rightarrow {}^4I_{15/2}$  transitions of Er<sup>3+</sup>.
